# Supplementary material
Source: HighWire-hosted journal article supplement (https://jnm.snmjournals.org/highwire/filestream/95061/field_highwire_adjunct_files/0/182147_Supplemental_Data.pdf)
Supplement: 182147_Supplemental_Data.pdf [file 182147_Supplemental_Data.pdf]

**SUPPLEMENTAL TABLE 1.** Volumes of Interest (cm<sup>3</sup>)  
for Analyzed Ocular Tissues

|                       | <b>Scan 1</b> | <b>Scan 2</b> |
|-----------------------|---------------|---------------|
| <b>Retina</b>         | 0.9±0.3       | 0.9±0.3       |
| <b>Vitreous humor</b> | 0.3±0.1       | 0.3±0.1       |
| <b>Eye muscle</b>     | 1.9±0.8       | 1.7±0.7       |

Data are given as mean ± SD (*n* = 5)

**SUPPLEMENTAL TABLE 2.** Outcome Parameters for Retina, Vitreous Humor and Eye Muscle from 2T4K Model and Logan Graphical Analysis

|                    | Retina            |                   | Vitreous humor    |                    | Eye muscle       |                  |
|--------------------|-------------------|-------------------|-------------------|--------------------|------------------|------------------|
|                    | Scan 1            | Scan 2            | Scan 1            | Scan 2             | Scan 1           | Scan 2           |
| $K_1$ (mL/(g·min)) | 0.044±0.007 (34)  | 0.064±0.023 (19)* | 0.019±0.006 (69)  | 0.021±0.011 (71)   | 0.166±0.060 (6)  | 0.194±0.080 (8)  |
| $k_2$ (1/min)      | 0.35±0.12 (103)   | 0.14±0.07 (73)*   | 0.48±0.33 (223)   | 0.28±0.23 (119)    | 0.18±0.07 (10)   | 0.26±0.10 (12)   |
| $k_3$ (1/min)      | 0.28±0.11 (75)    | 0.11±0.09 (87)    | 0.30±0.16 (269)   | 0.12±0.10 (187)    | 0.02±0.01 (30)   | 0.04±0.03 (28)   |
| $k_4$ (1/min)      | 0.041±0.016 (38)  | 0.039±0.022 (42)  | 0.562±1.117 (189) | 0.345±0.715 (501)* | 0.030±0.016 (39) | 0.044±0.019 (39) |
| $V_T$ (mL/g)       | 1.07±0.33 (9)     | 1.76±0.51 (14)*   | 0.27±0.11 (19)    | 0.43±0.15 (32)     | 1.71±0.47 (9)    | 1.36±0.25 (3)    |
| $V_T$ Logan (mL/g) | 1.03±0.27 (9)     | 1.54±0.28 (6)*    | 0.28±0.12 (19)    | 0.38±0.12 (16)     | 1.61±0.55 (4)    | 1.30±0.19 (2)    |
| $V_b$              | 0.008±0.008 (179) | 0.009±0.002 (80)  | 0.003±0.002 (69)  | 0.003±0.001 (142)  | 0.005±0.003 (49) | 0.005±0.006 (7)  |
| AIC                | 19.8±17.9         | 13.4±19.1         | 18.9±8.7          | 32.8±18.5          | 9.8±8.0          | 4.0±19.8         |

Outcome parameters are given as mean ± SD ( $n = 5$ ). The value in parentheses represents the precision of parameter estimates (expressed as their coefficient of variation in percent), averaged over the study subjects.

$K_1$ ,  $k_2$ ,  $k_3$ ,  $k_4$ : rate constants for exchange of radioactivity between arterial plasma and ocular tissue compartments;  $V_T$ : total distribution volume;  $V_T$  Logan:  $V_T$  estimated with Logan graphical analysis;  $V_b$ : vascular volume fraction; AIC: Akaike information criterion

\*  $P < 0.05$  for comparison with scan 1 using Wilcoxon signed rank test

**SUPPLEMENTAL TABLE 3.** Outcome Parameters for Retina, Vitreous Humor and Eye Muscle from 1T2K Model<sup>§</sup>

|                    | Retina           |                  | Vitreous humor   |                  | Eye muscle        |                  |
|--------------------|------------------|------------------|------------------|------------------|-------------------|------------------|
|                    | Scan 1           | Scan 2           | Scan 1           | Scan 2           | Scan 1            | Scan 2           |
| $K_1$ (mL/(g·min)) | 0.034±0.007 (8)  | 0.060±0.023 (6)* | 0.014±0.004 (26) | 0.020±0.012 (18) | 0.164±0.055 (4)   | 0.180±0.074 (5)  |
| $k_2$ (1/min)      | 0.11±0.04 (20)   | 0.09±0.05 (21)   | 0.14±0.06 (51)   | 0.16±0.11 (44)   | 0.16±0.05 (8)     | 0.20±0.06 (7)    |
| $K_1/k_2$          | 0.35±0.13 (14)   | 0.82 ±0.32 (1)*  | 0.10±0.03 (1)    | 0.17±0.14 (1)    | 1.00±0.19 (1)     | 0.89±0.18 (1)    |
| $V_b$              | 0.010±0.011 (36) | 0.009±0.003 (40) | 0.004±0.002 (88) | 0.002±0.001 (48) | 0.004±0.002 (101) | 0.007±0.004 (30) |
| AIC                | -10.6±8.9        | -9.7±5.6         | 4.3±7.3          | 1.1±10.4         | -10.7±14.4        | -7.5±11.15       |

<sup>§</sup> PET and blood data from 0-10 min were used for analysis

Outcome parameters are given as mean ± SD ( $n = 5$ ). The value in parentheses represents the precision of parameter estimates (expressed as their coefficient of variation in percent), averaged over the study subjects.

$K_1$ ,  $k_2$ : rate constants for exchange of radioactivity between arterial plasma and ocular tissue compartment;  $V_b$ : vascular volume fraction; AIC: Akaike information criterion

\*  $P < 0.05$  for comparison with scan 1 using Wilcoxon signed rank test
